# Supplementary material for: Development of methionine methylation profiling and relative quantification in human breast cancer cells based on metabolic stable isotope labeling
Source: Royal Society of Chemistry journal article supplement (doi:10.1039/c9an00545e), 2019-01-01
Supplement: c9an00545e1.pdf [file c9an00545e1.pdf]

## Supporting Information

### **Development of methionine methylation profiling and relative quantification in human breast cancer cells based on stable isotope metabolic labeling**

Han Liao<sup>a</sup>, Qingce Zang<sup>a</sup>, Qinglin Lv<sup>a</sup>, Yang Gao<sup>a</sup>, Zitong Zhao<sup>c</sup>, Jiuming He<sup>a</sup>, Ruiping Zhang<sup>a</sup>, Yongmei Song<sup>c</sup>, Yanhua Chen<sup>\*a</sup> and Zeper Abliz<sup>ab</sup>

<sup>a</sup> *State Key Laboratory of Bioactive Substance and Function of Natural Medicines, Institute of Materia Medica, Chinese Academy of Medical Sciences and Peking Union Medical College, Beijing, 100050, PR China*

<sup>b</sup> *Centre for Bioimaging & Systems Biology, Minzu University of China, Beijing, 100081, PR China*

<sup>c</sup> *State Key Laboratory of Molecular Oncology, Cancer Hospital, Chinese Academy of Medical Sciences and Peking Union Medical College, Beijing, 100021, PR China*

\* Corresponding author. No.1 Xian Nong Tan Street, Beijing 100050, China.

E-mail addresses: chenyanhua@imm.ac.cn (Y. Chen)

## CONTENTS

|                                                                                                                                                                      |      |
|----------------------------------------------------------------------------------------------------------------------------------------------------------------------|------|
| Methods.....                                                                                                                                                         | S-3  |
| Supplementary Tables and Figures .....                                                                                                                               | S-5  |
| Fig. S1 Labeling rate of methionine.....                                                                                                                             | S-5  |
| Fig. S2 Correlation analysis of methylated metabolites in BCs.....                                                                                                   | S-5  |
| 5                                                                                                                                                                    |      |
| Fig. S3 MS and MS/MS spectra of SAAOMS and its identification.....                                                                                                   | S-6  |
| Fig. S4 MS and MS/MS spectra of SAM and its identification.....                                                                                                      | S-6  |
| 6                                                                                                                                                                    |      |
| Fig. S5 Metabolic pathways enrichment analysis of methylated metabolites in BCs.....                                                                                 | S-7  |
| 7                                                                                                                                                                    |      |
| Table. S1 The information list, including compound name, m/z, RT, regression equation, correlation coefficient and accuracy of targeted methylation metabolites..... | S-8  |
| Table. S2 The parameters of MS for targeted metabolites relative quantification .....                                                                                | S-10 |
| .....                                                                                                                                                                | S-10 |
| Fig. S6 Discrimination of investigated BC cell lines by OPLS-DA.....                                                                                                 | S-11 |
| 11                                                                                                                                                                   |      |
| Fig. S7 Hierarchical cluster analysis of the labeled methylated metabolites in BCs and MEC.....                                                                      | S-12 |

## Methods

**Chemicals and Reagents.** The metabolite standards including L-methionine, <sup>13</sup>C,<sub>3</sub>-Met-L-methionine, creatine, 5-methylthioadenosine, 1-methyl-nicotinamide, monomethyl-L-arginine acetate, dimethylarginine, adenine, guanine, cytosine, taurine, arginine, dimethyl glycine, lysine, histidine, serine, thymine, cystathionine and N',N',N'-trimethyl-L-lysine chloride were purchased from Sigma-Aldrich (St. Louis, MO, USA) and S-adenosyl methionine and S-adenosyl homocysteine were purchased from Ark Pharm (Chicago, US). All standards were stored at 4 °C or -20 °C before use according to their instructions.

**The parameters for peak finding, filtering, alignment, scaling and identification using R software. (based on data of cell samples using LC-ESI (+)-MS, for example)**

```
rm(list=ls(all=TRUE))
library(Biobase)
library(xcms)
library(multtest)
library(CAMERA)
sessionInfo()
xs<-xcmsSet(profmethode = "binlin",method="centWave",ppm = 2.5, peakwidth=c(5,15),snthresh
=30, prefilter=c(5,5000),integrate=1, mzdiff =0.02)
xs <-group(xs,bw=2,minfrac=0.8,mzwid=0.015)
save(xs,file="xs.Rda")
ret.xs.obiwarp <-retcor(xs,method="obiwarp",plottype="deviation")
ret.xs.obiwarp<-group(ret.xs.obiwarp, bw = 5,minfrac=0.8,mzwid=0.015)
ret.xs.obiwarp
fill.ret.xs.obiwarp<-fillPeaks(ret.xs.obiwarp)
fill.ret.xs.obiwarp
save(fill.ret.xs.obiwarp, file="fill.ret.xs.obiwarp.Rda")
an.1<annotate(fill.ret.xs.obiwarp,sigma=6,perfwhm=0.3,cor_eic_th=0.75,maxcharge=3,maxiso=3,m
zabs=0.03,multiplier=3,polarity="positive")
peaklist.1<-getPeaklist(an.1)
```

```
write.csv(peaklist.1,file='annotated.1.csv')
```

**The parameters for possible  $^{13}\text{CD}_3$ -labeled compounds peak search using Python software (based on data of cell samples using LC-ESI(+)-MS, for example)**

```
import pandas as pd
import numpy as np
PPM = 1e-6
def find_isotope(a,dif=4.015,rthreshold=10*PPM,rt_threshold=.05,abs_threshold=.1):
    abs_err = abs(abs(a['M/Z'].values-a['M/Z'].values[:,np.newaxis])-dif)
    mask_rt = abs(a['RT'].values-a['RT'].values[:,np.newaxis])<rt_threshold
    np.fill_diagonal(mask_rt,False)
    if rthreshold is not None:
        mask_mz = abs_err<a['M/Z'].values*rthreshold
        mask_ = mask_mz&mask_rt
        mask = np.any(mask_,axis=1)
    else:
        mask_mz = abs_err<abs_threshold
        mask_ = mask_mz&mask_rt
        mask = np.any(mask_,axis=1)
    return a.loc[mask]
def find_isotope(input_output,dif=4.015,rthreshold=20*PPM,rt_threshold=.05):
input_ ='input-data.xlsx'
output_ ='output-data.xlsx'
dif=4.022/6.044/12.066
mz_rthreshold=5*PPM
rt_threshold=0.02
df_ = pd.read_excel(input_).loc[:,['M/Z','RT']]
    result =find_isotope_(df_,dif=dif,rthreshold=rthreshold,rt_threshold=rt_threshold)
    result.sort_values(['M/Z','RT']).reset_index(drop=True).to_excel(output_)
    return result
```

Supplementary Tables and Figures

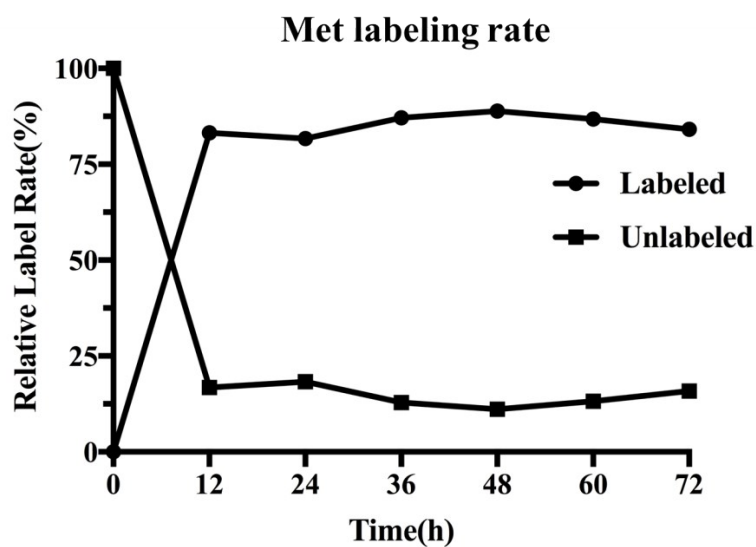

Fig. S1 Labeling rate of methionine. Labeled rate % =  $^{13}\text{CD}_3\text{-Met} / (^{13}\text{CD}_3\text{-Met} + ^{12}\text{CH}_3\text{-Met}) * 100$ .

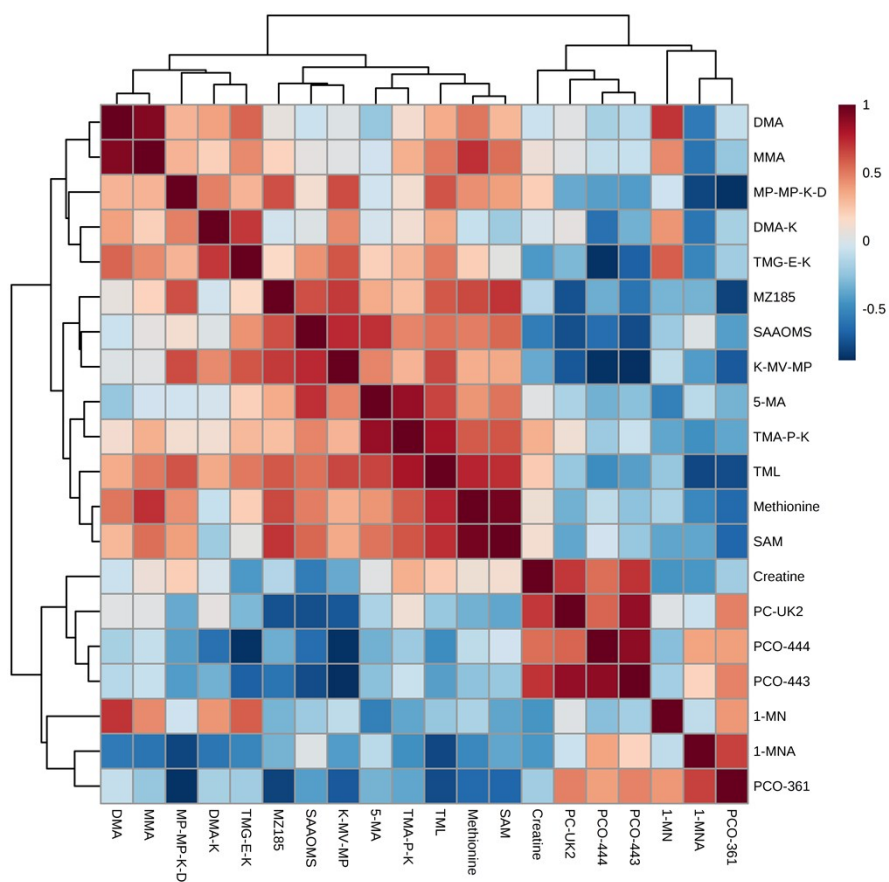

Fig. S2 Correlation analysis of methylated metabolites in BCs.

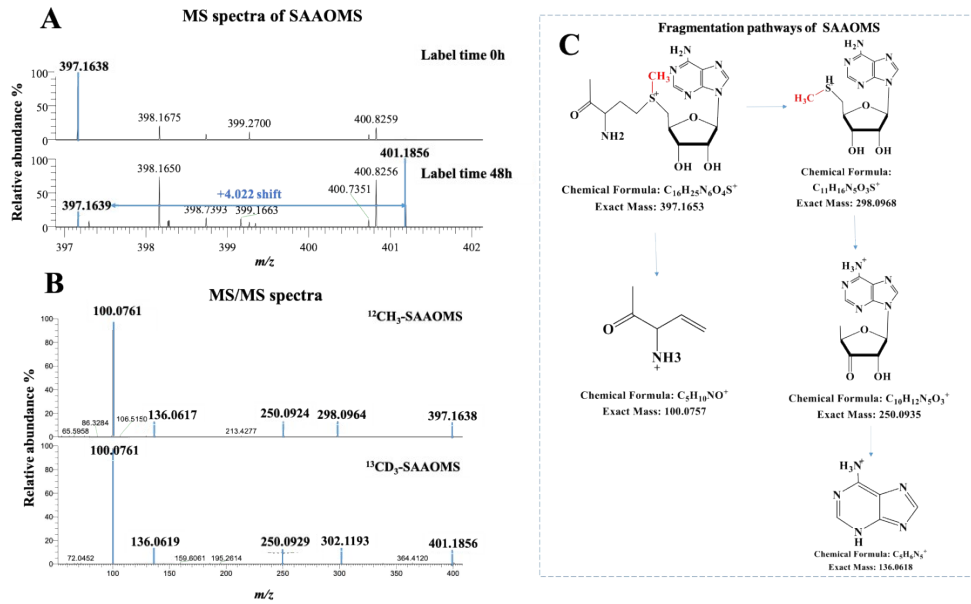

**Fig. S3** MS and MS/MS spectra of SAAOMS and its identification. (A) MS spectra of SAAOMS. (B) MS/MS spectra of SAAOMS. (C) Fragmentation pathways of SAAOMS.

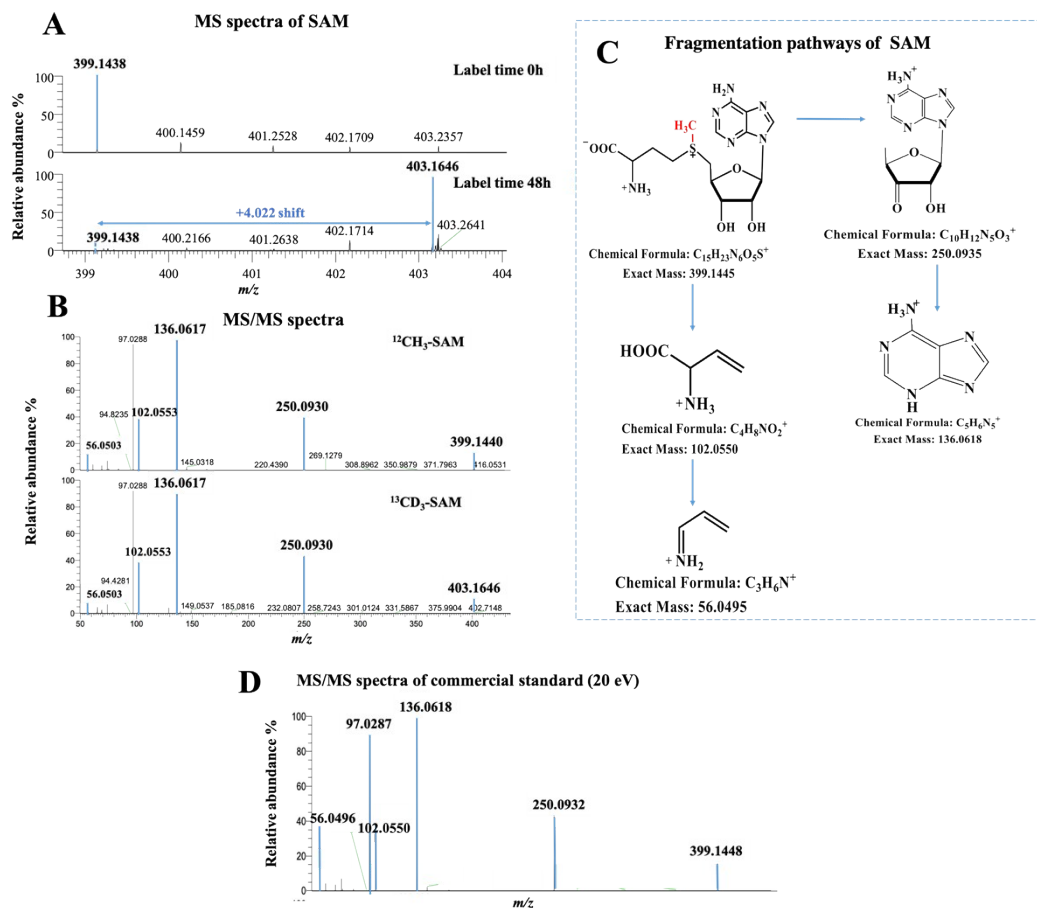

**Fig. S4** MS and MS/MS spectra of SAM and its identification. (A) MS spectra of SAM. (B) MS/MS spectra of SAM. (C) Fragmentation pathways of SAAOMS. (D) MS/MS spectra of commercial standard.

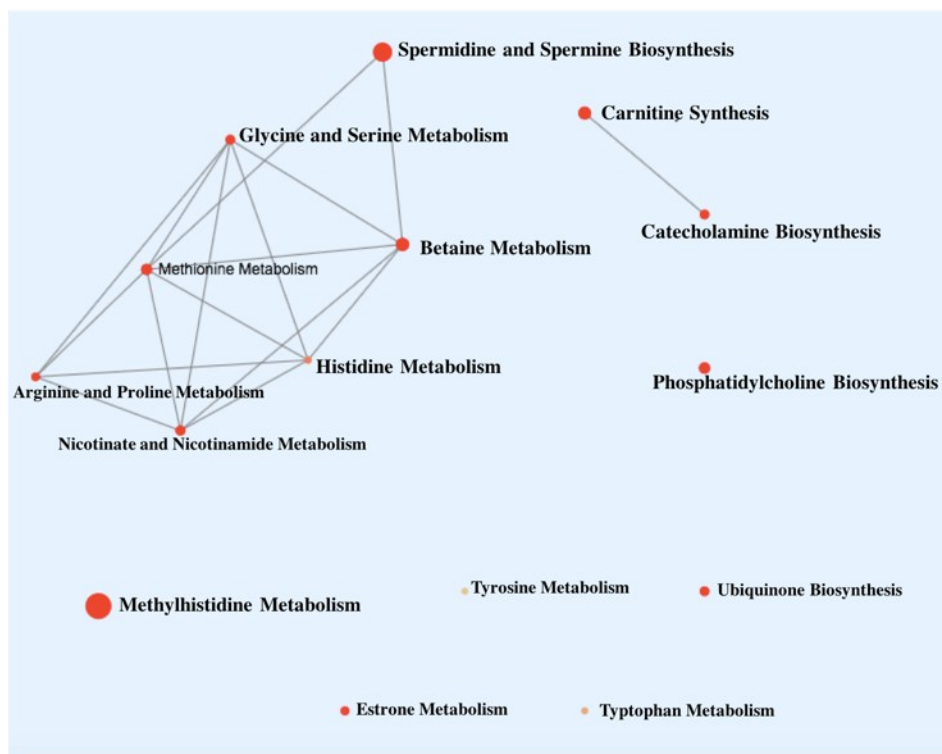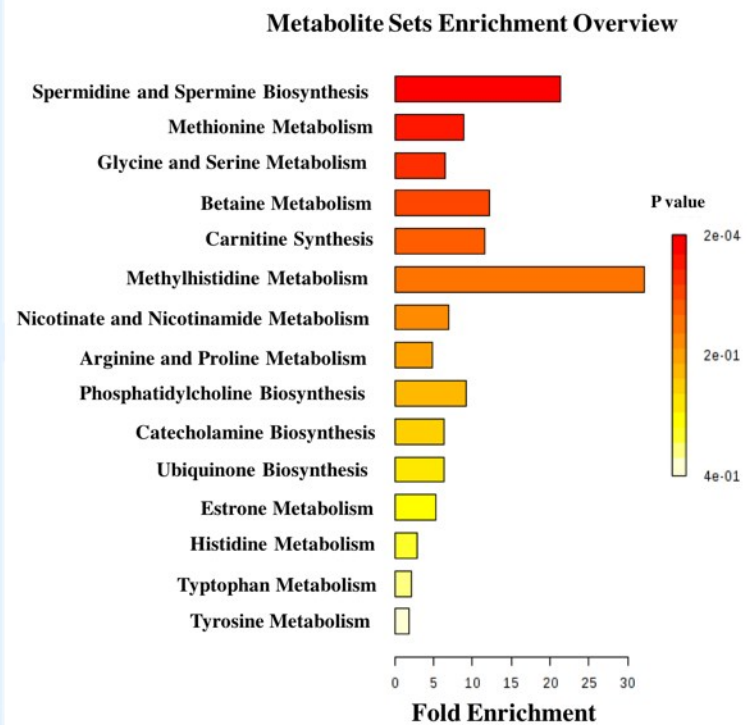

Fig. S5 Metabolic pathways enrichment analysis of methylated metabolites in BCs.

**Table. S1** The information list, including compound name, *m/z*, RT, regression equation, correlation coefficient and accuracy of targeted methylation metabolites.

UK, unknown.

| ID | Compound<br>Abbreviations | Quantification<br>method | <i>m/z</i> | <i>m/z</i> (I.S) | RT(min) | Calibration curve      | R <sup>2</sup> | Weight | Precision(%) |        |      |
|----|---------------------------|--------------------------|------------|------------------|---------|------------------------|----------------|--------|--------------|--------|------|
|    |                           |                          |            |                  |         |                        |                |        | Low          | Medium | High |
| 1  | Creatine                  | XIC                      | 132.0765   | 136.0985         | 12.45   | $y=7.107e-1x+5.785e1$  | 0.9995         | equal  | 13.92        | 3.03   | 6.78 |
| 2  | 1-MNA                     | XIC                      | 137.0705   | 141.0925         | 6.57    | $y=1.383e-2x+4.286e-2$ | 0.9980         | equal  | 8.60         | 5.78   | 6.09 |
| 3  | 1-MN                      | SIM                      | 138.0545   | 142.0765         | 10.88   | $y=1.136e-1x+8.903e-1$ | 0.9951         | equal  | 19.35        | 12.91  | 9.61 |
| 4  | Methionine                | XIC                      | 150.0583   | 154.0802         | 9.9     | $y=2.536e-2x+1.548e-1$ | 0.9991         | equal  | 4.70         | 1.05   | 1.92 |
| 5  | MZ185                     | XIC                      | 185.128    | 189.15           | 11.91   | $y=2.159e-2x+6.521e-1$ | 0.9946         | equal  | 17.30        | 13.20  | 5.07 |
| 6  | MMA                       | SIM                      | 189.1342   | 193.1562         | 11.25   | $y=7.757e-2x+1.732e0$  | 0.9979         | equal  | 18.74        | 8.77   | 6.65 |
| 7  | 5-MA                      | XIC                      | 298.0959   | 302.1183         | 3.43    | $y=1.202e-2x+1.74e-1$  | 0.9999         | equal  | 4.72         | 2.08   | 2.19 |
| 8  | SAAOMS                    | SIM                      | 397.1635   | 401.1855         | 8.33    | $y=2.265e-2x+2.009e-1$ | 0.9824         | equal  | 20.70        | 4.80   | 5.68 |
| 9  | SAM                       | XIC                      | 399.1434   | 403.1654         | 11.64   | $y=1.356e-2x+1.706e-1$ | 0.9999         | equal  | 6.59         | 2.65   | 3.11 |
| 10 | DMA                       | XIC                      | 203.1501   | 211.1941         | 10.81   | $y=2.635e-2x+4.384e-1$ | 0.9994         | equal  | 17.84        | 5.35   | 3.63 |
| 11 | DMA-K                     | XIC                      | 246.1804   | 254.2244         | 11.99   | $y=4.22e-1x+6.848e0$   | 0.9884         | equal  | 14.31        | 2.59   | 5.83 |
| 12 | K-MV-MP                   | XIC                      | 369.2486   | 377.2926         | 11.91   | $y=2.04e-2x+3.233e-1$  | 0.9997         | equal  | 18.74        | 6.57   | 6.01 |
| 13 | MP-MP-K-D                 | SIM                      | 484.2764   | 492.3213         | 17.28   | $y=1.876e-2x+4.41e-1$  | 0.9998         | equal  | 18.47        | 10.12  | 9.06 |



|    |            |     |          |          |       |                        |        |       |       |       |      |
|----|------------|-----|----------|----------|-------|------------------------|--------|-------|-------|-------|------|
| 14 | TML        | XIC | 189.1593 | 201.2253 | 12.23 | $y=7.487e-2x+7.166e-1$ | 0.9926 | equal | 13.12 | 1.34  | 3.97 |
| 15 | TMA-P-K    | XIC | 357.2486 | 369.3146 | 11.91 | $y=1.226e-1x+3.346e0$  | 0.9935 | equal | 10.91 | 1.57  | 1.66 |
| 16 | TMG-E-K    | SIM | 375.2225 | 387.2885 | 16.79 | $y=4.668e-1x+6.201e-1$ | 0.9827 | equal | 18.82 | 10.19 | 7.39 |
| 17 | PC(O-36:1) | XIC | 788.6143 | 800.6793 | 13.54 | $y=4.686e0x+4.398e2$   | 0.9987 | equal | 9.42  | 3.98  | 4.14 |
| 18 | PC(O-44:4) | XIC | 880.7155 | 892.7815 | 22.78 | $y=2.803e-2x+6.254e-1$ | 0.9899 | equal | 20.36 | 5.50  | 2.94 |
| 19 | PC(O-44:3) | XIC | 882.7311 | 894.7971 | 22.11 | $y=1.761e-2x+5.789e-1$ | 0.9980 | equal | 18.92 | 5.58  | 0.98 |
| 20 | PC-UK2     | XIC | 887.6864 | 899.7538 | 22.11 | $y=1.807e-2x+5.855e-1$ | 0.9983 | equal | 16.57 | 7.15  | 7.42 |

---

**Table. S2** The parameters of MS for targeted metabolites relative quantification.

| <b>Assay</b>  | <b><i>m/z</i> scan range</b> | <b>Scan type</b>  | <b>Resolution</b> | <b>AGC target</b> | <b>IT time</b> |
|---------------|------------------------------|-------------------|-------------------|-------------------|----------------|
| SIM assay     | 50-600                       | Full scan         | 17500             | 5e6               | 100ms          |
|               |                              | SIM (for 3 times) | 70000             | 5e6               | 200ms          |
| Full MS assay | 100-1200                     | Full scan         | 70000             | 5e6               | 100ms          |

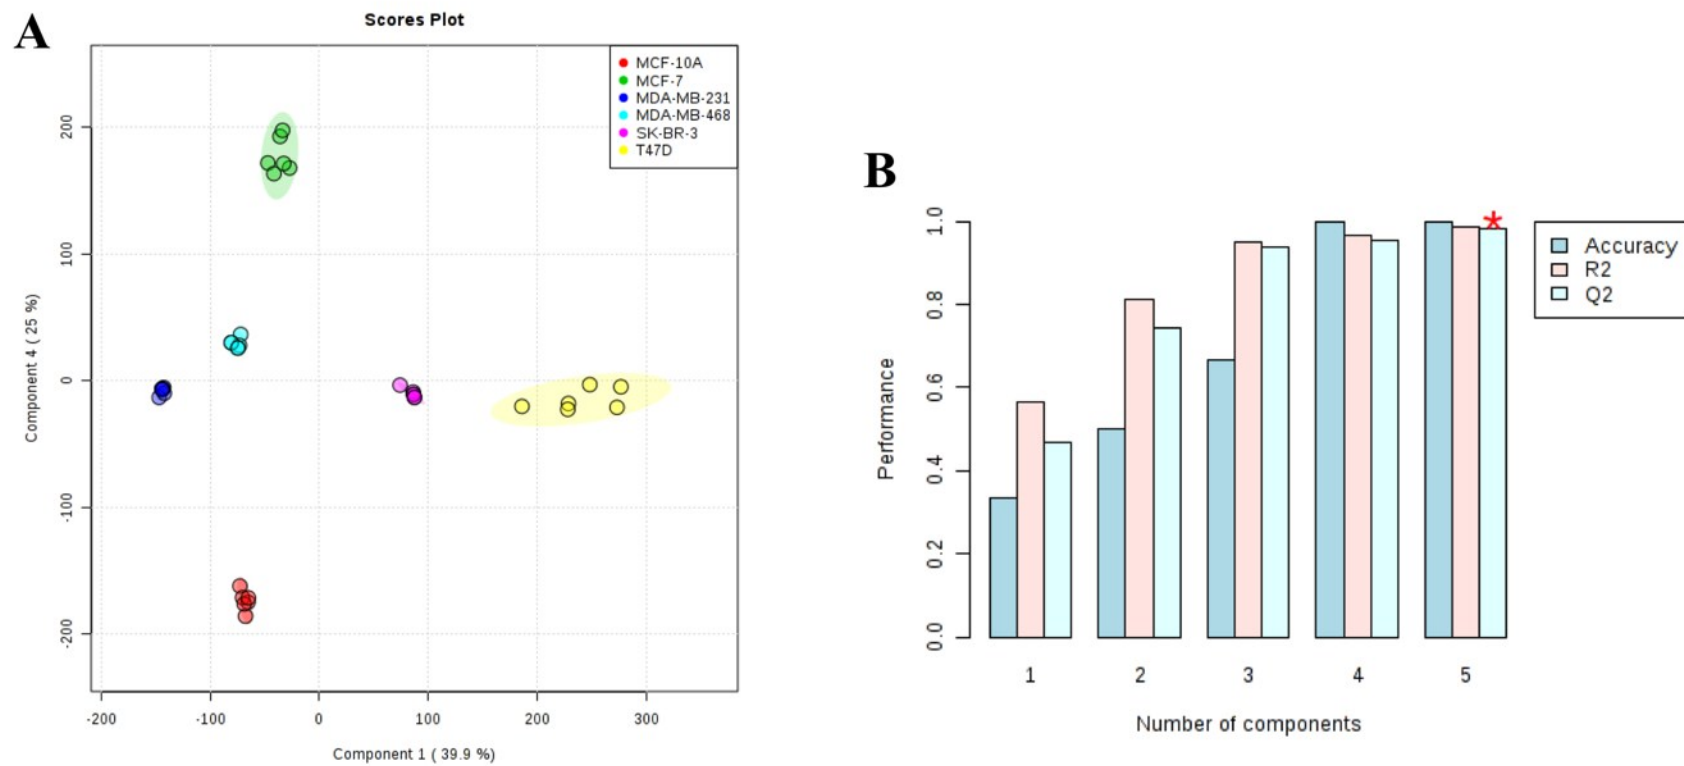

**Fig. S6** Discrimination of investigated BC cell lines by OPLS-DA. (A) Based on relative metabolites abundance, the scores plot indicated similarities and differences between samples and groups. Confidence ellipses show confidence regions. Percentage of variance explained by individual component is indicated. (B) Performance measurement of OPLS-DA based on endometabolite levels using different numbers of components, showing the accuracy, multiple correlation coefficient R2 and the explained variance in prediction Q2: The red '\*' indicates the best value of selected measure (Q2).

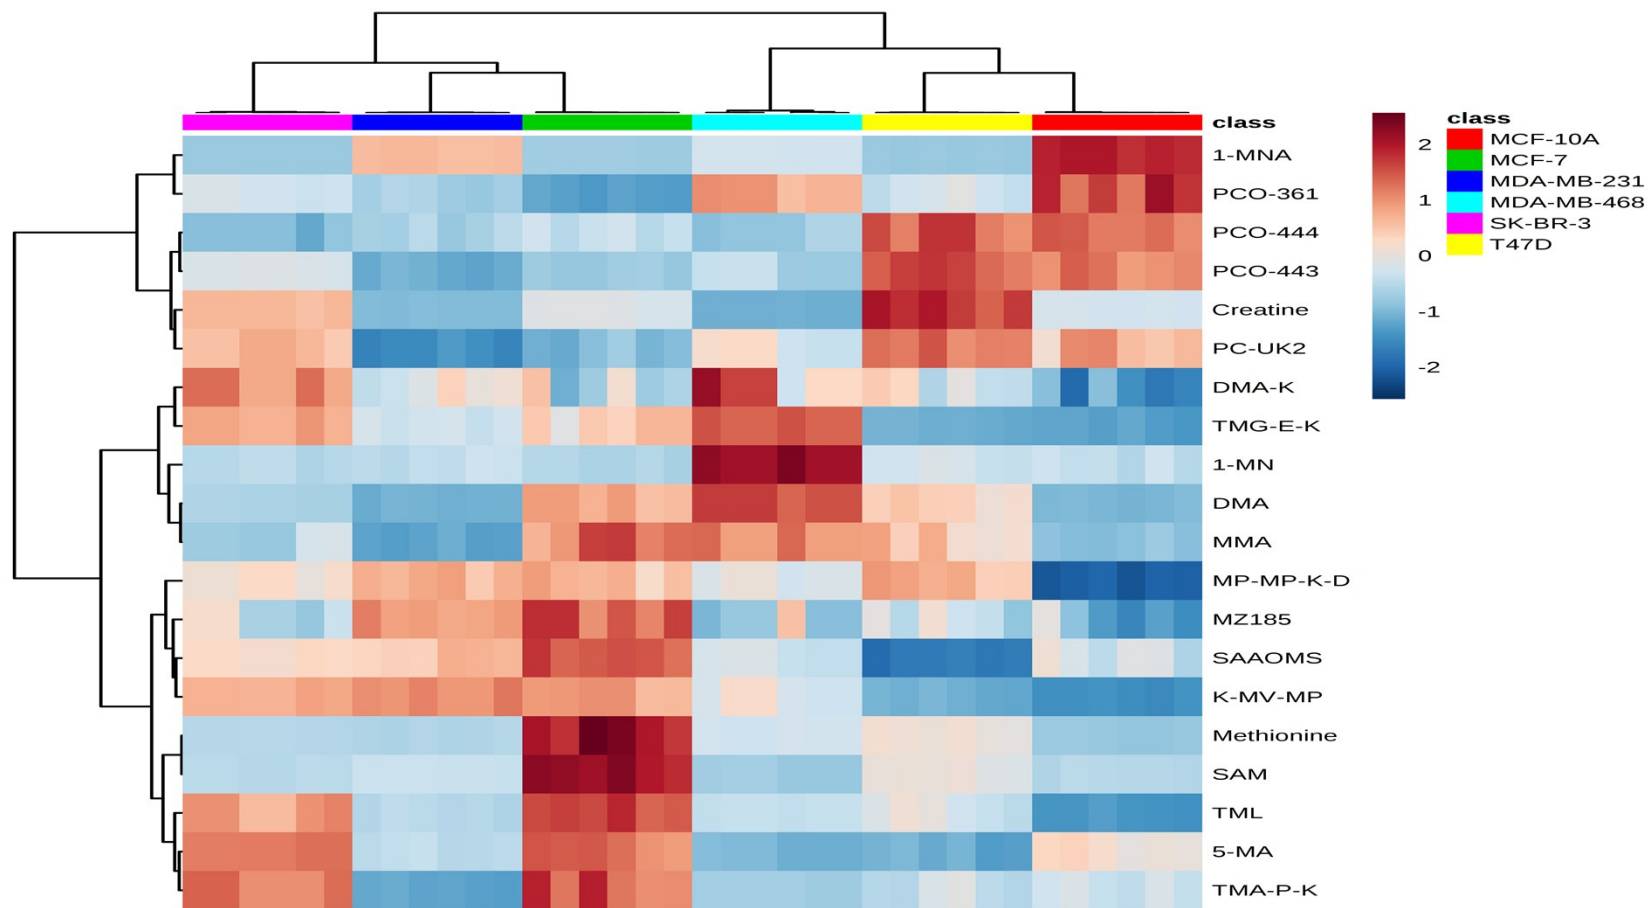

**Fig. S7** Hierarchical cluster analysis of the labeled methylated metabolites in BCs and MEC. The relative abundance of MDA-MB-231 was used of normalized factor and other cell samples were corrected by the normalization
